# No Evidence of Dehydration with Moderate Daily Coffee Intake: A Counterbalanced Cross-Over Study in a Free-Living Population

Sophie C. Killer<sup>‡</sup>, Andrew K. Blannin<sup>\*</sup>, Asker E. Jeukendrup<sup>‡</sup>

School of Sport and Exercise Sciences, University of Birmingham, Birmingham, West Midlands, United Kingdom

## Abstract

It is often suggested that coffee causes dehydration and its consumption should be avoided or significantly reduced to maintain fluid balance. The aim of this study was to directly compare the effects of coffee consumption against water ingestion across a range of validated hydration assessment techniques. In a counterbalanced cross-over design, 50 male coffee drinkers (habitually consuming 3–6 cups per day) participated in two trials, each lasting three consecutive days. In addition to controlled physical activity, food and fluid intake, participants consumed either 4×200 mL of coffee containing 4 mg/kg caffeine (C) or water (W). Total body water (TBW) was calculated pre- and post-trial via ingestion of Deuterium Oxide. Urinary and haematological hydration markers were recorded daily in addition to nude body mass measurement (BM). Plasma was analysed for caffeine to confirm compliance. There were no significant changes in TBW from beginning to end of either trial and no differences between trials ( $51.5 \pm 1.4$  vs.  $51.4 \pm 1.3$  kg, for C and W, respectively). No differences were observed between trials across any haematological markers or in 24 h urine volume ( $2409 \pm 660$  vs.  $2428 \pm 669$  mL, for C and W, respectively), USG, osmolality or creatinine. Mean urinary  $\text{Na}^+$  excretion was higher in C than W ( $p = 0.02$ ). No significant differences in BM were found between conditions, although a small progressive daily fall was observed within both trials ( $0.4 \pm 0.5$  kg;  $p < 0.05$ ). Our data show that there were no significant differences across a wide range of haematological and urinary markers of hydration status between trials. These data suggest that coffee, when consumed in moderation by caffeine habituated males provides similar hydrating qualities to water.

**Citation:** Killer SC, Blannin AK, Jeukendrup AE (2014) No Evidence of Dehydration with Moderate Daily Coffee Intake: A Counterbalanced Cross-Over Study in a Free-Living Population. PLoS ONE 9(1): e84154. doi:10.1371/journal.pone.0084154

**Editor:** Dylan Thompson, University of Bath, United Kingdom

**Received:** August 14, 2013; **Accepted:** November 12, 2013; **Published:** January 9, 2014

**Copyright:** © 2014 Killer et al. This is an open-access article distributed under the terms of the Creative Commons Attribution License, which permits unrestricted use, distribution, and reproduction in any medium, provided the original author and source are credited.

**Funding:** Funding for this study was provided by the Institute for Scientific Information on Coffee (ISIC). ISIC is a non-profit organisation, devoted to the study and disclosure of science related to coffee and health. The funders had no role in study design, data collection and analysis, decision to publish, or preparation of the manuscript.

**Competing Interests:** S.C. Killer and A.K. Blannin have declared that no competing interests exist. A.E. Jeukendrup is currently employed by PepsiCo Inc. and is an adjunct Professor at the University of Birmingham. The views expressed here are the views of the authors and not those of PepsiCo Inc. The current employment of Professor Asker Jeukendrup by PepsiCo Inc. does not alter the authors' adherences to all the PLOS ONE policies on sharing data and materials.

\* E-mail: A.K.Blannin@bham.ac.uk

<sup>‡</sup> Current address: School of Sport, Exercise and Health Sciences, Loughborough University, Leicestershire, East Midlands, United Kingdom

## Introduction

Maintenance of fluid balance is essential to sustain human life. Water intake balances fluid losses to achieve adequate hydration of bodily tissues. Although there are widespread guidelines in scientific literature and media for achieving optimal hydration status and about the effects that various caffeinated beverages may have on fluid balance, there is no clear consensus about how much fluid an individual should consume [1]. One study found total daily fluid intake observed in healthy adults varied from 0.416–4.316 L/day [2]. The current EFSA dietary references values for water intakes for male adults is 2.5 L/day [3]. However, published guidelines range from 1.5 L/day [4] to 3.7 L/day [5] for adult males. It has been suggested that caffeinated beverages should not be included in daily fluid requirement guidelines [6] and that a glass of water should be consumed with every cup of coffee or tea to ensure hydration is maintained [7].

Caffeine (1, 3, 7-trimethylxanthine) is a naturally occurring methylxanthine which can be found in coffee, tea and chocolate. Caffeine acts as an adenosine receptor antagonist to reduce

fractional sodium reabsorption in both the proximal tubule and distal nephron. When consumed in large doses ( $\geq 500$  mg), caffeine elicits a diuretic effect [8–10]. The diuretic potential of caffeine in humans has been researched for many years, with the first scientific report published over 80 y ago [11]. The authors of these early findings suggested that whilst caffeine causes acute diuresis, regular caffeine consumption may lead to a tolerance developing against its diuretic effect. It has since been suggested that caffeine withdrawal of as little as 4 days is sufficient for tolerance to be lost [12]. Following the work of Eddy & Downs [11], there has been a range of studies that have investigated the effects of caffeine on hydration status (Table 1). These studies report observations across a range of caffeine forms and doses on various markers of hydration status in either caffeine-habituated or caffeine-naïve populations (individuals who do not habitually consume caffeine, or those who have abstained from caffeine consumption for  $\geq 4$  days). Although the data are somewhat varied, the general trend is that higher doses of caffeine in caffeine-naïve individuals will elicit an acute increase in urine volume, yet a

**Table 1.** Effect of caffeine consumption on urine production.

| Authors | Caffeine Dose (mg)     | Caffeine Source                                                                           | Test population                                                         | Diuretic Effect             |
|---------|------------------------|-------------------------------------------------------------------------------------------|-------------------------------------------------------------------------|-----------------------------|
| [8]     | 4 mg/d (200–700 mg)    | Caffeine tablet                                                                           | Habituated caffeine users                                               | Yes –during first day only  |
| [9]     | 490–680 (8.7 mg/kg bw) | Caffeine powder added to carbohydrate electrolyte drink Vs carbohydrate electrolyte drink | Caffeine naïve (Habitual coffee drinkers – 4 day pre-trial deprivation) | Yes                         |
| [10]    | 642                    | Caffeinated coffee                                                                        | Caffeine naïve (Habitual coffee drinkers – 5 day pre-trial deprivation) | Yes                         |
| [14]    | 452                    | Caffeine tablet                                                                           | Habitual caffeine users – $98 \pm 17$ mg/day                            | No                          |
| [17]    | 360                    | Caffeine tablet                                                                           | NA                                                                      | Yes                         |
| [15]    | 300                    | Caffeine tablet                                                                           | Habitual coffee drinkers – 8 h pre-trial deprivation                    | No                          |
| [25]    | 250                    | Caffeine beverage                                                                         | Caffeine naïve (Non-coffee drinkers – 3 week caffeine deprived)         | Yes                         |
| [31]    | 250                    | Caffeine tablet                                                                           | Caffeine naïve (1 week caffeine deprived)                               | Yes –during first hour only |
| [32]    | 240                    | Caffeine beverage                                                                         | Caffeine habituated users                                               | Yes                         |
| [14]    | 226                    | Caffeine capsules                                                                         | Habitual caffeine users – $98 \pm 17$ mg/day                            | No                          |
| [16]    | 168 and 252            | Caffeinated tea                                                                           | Caffeine users – 12 h deprived                                          | No                          |
| [13]    | 114–253                | Caffeinated carbonated cola, Caffeinated carbonated, non-caloric cola, Instant coffee     | Caffeine habituated (61–464 mg/day)                                     | No                          |
| [17]    | 45, 90 and 180         | Caffeine tablet                                                                           | NA                                                                      | No                          |

doi:10.1371/journal.pone.0084154.t001

low to moderate dose of caffeine does not induce a diuretic effect [13–17].

Coffee is comprised of many bioactive compounds in addition to caffeine. These active compounds may interact with each other and therefore coffee consumption cannot be directly compared to caffeine consumption in its purest form (1,3,7-trimethyl xanthine) [18]. Interestingly, only two studies have specifically investigated the effects of caffeine in the form of coffee on hydration status. One study investigated the effects of six cups of coffee (624 mg caffeine) on urine excretion following a five day caffeine deprivation period [10]. Over the 24 h period, authors report a 2.7% decrease in total body water and a 41% increase in urine excretion, with a subsequent 66% and 28% increase in urinary sodium and potassium excretion, respectively. Due to the study design, which only included caffeine habituated participants who abstained from caffeine for 5 days prior to testing, the results of the study should be interpreted with caution before applying to habitual moderate-intake coffee drinkers. Another study investigated the effects of consuming equal amounts of water, caffeinated cola and caffeinated coffee ( $3.1 \pm 0.4$  mg/kg caffeine/day) against water with a mixture of caffeinated colas ( $1.4 \pm 0.2$  mg/kg caffeine/day) or non-caffeinated beverages [13]. The authors found no effects of coffee consumption compared with non-caffeinated beverages across a range of hydration markers in caffeine-habituated participants. Whilst the authors concluded that the advice to exclude caffeinated beverages from daily fluid requirement was not supported by their findings, the study did not measure total body water. Total body water (TBW) estimations using the doubly labelled water dilution technique is considered the gold standard method for assessing body water fluctuations over time [14]. One recent study investigated the effects of caffeine on TBW using deuterium oxide [19]. Thirty participants classified as low caffeine users ( $<100$  mg/day) consumed caffeine (5 mg/kg/day) or placebo tablets for 4 consecutive days. Although these participants could not be classified as 'caffeine-habituated', no changes in TBW measured on day 1 and 4 were found between

the caffeine or placebo group. The authors suggested that a moderate dose of caffeine does not alter TBW in healthy men. To date, no studies have investigated the effects of moderate coffee consumption on TBW in caffeine-habituated adults using the doubly labelled water dilution technique.

It is estimated that 1.6 billion cups of coffee are consumed worldwide every day [20], thus it is of interest to know whether coffee contributes to daily fluid requirement, or whether it causes low-level chronic dehydration. In the present study, our aim was to directly compare the effects of a moderate intake of coffee in caffeine-habituated adults against equal amounts of water across a wide range of hydration markers, including the gold standard TBW measure.

## Methods

### Ethics Statement

All participants were informed of the purposes of the study and the risks associated with the procedures. Written informed consent was obtained from all participants before the study commenced. The study was approved by the Science, Technology, Engineering and Mathematics (STEM) Ethical Review Committee at the University of Birmingham, UK.

### Participants

Fifty-two healthy non-smoking males aged 18–46 y were accepted to participate in the study following the screening of over 100 volunteers. Inclusion criteria required participants to be weight stable, pass a general health questionnaire, be free from medications containing caffeine or those that might influence weight or fluid-electrolyte balance, live and work in an environment of ambient temperature with no significant temperature or humidity fluctuations, consume a diet with no extreme food, beverage or dietary supplement intakes and be free from chronic illnesses. Females were excluded from the study due to possible disruptions to fluid balance by the menstrual cycle. Participants

were moderate coffee drinkers consuming 3–6 cups per day (300–600 mg/day caffeine) assessed by a 3-day weighed food diary. Two participants could not complete the study due to individual circumstances preventing them from visiting the laboratory.

## Study Design

Participants reported to the School of Sport and Exercise Sciences, Human Performance Laboratory at the University of Birmingham on two occasions prior to testing. Trials ran from Tuesdays to Fridays during the months of February to December. On their first visit, participants were instructed how to complete a 3-day weighed diet diary and were provided with a set of digital scales (Electronic Scales; Salter Arc) to weigh their food and fluid intake accurately to 0.1 g. On their second visit, participants returned their completed diet diary and baseline body weight was recorded. Each participant completed two treatments each lasting four consecutive days. Each trial was separated by a 10 day wash out period during which time participants were instructed to consume their normal diet and daily caffeine intake. See figure 1 for a schematic overview.

## Treatment

Each trial was undertaken in a counter balanced cross-over design and participants were randomly allocated to a treatment group. The coffee trial (C) involved participants consuming four mugs (200 mL) of black coffee per day (Nescafé Original) equating to a caffeine intake of 4 mg/kg BM. The water control trial (W) involved participants consuming four mugs of water (200 mL) per day. Participants were required to abstain from alcohol and all physical activity 24 h prior to and for the duration of each trial, with the exception of walking for transport.

Diet was controlled and provided to participants throughout each testing period, including the control days. The same diet was replicated and provided for each participant's second trial. Food and fluid intake recorded in the 3-day weighed food diary was analysed for macronutrients, sodium and potassium and food fluid content using nutrition analysis software (Nutritionist Pro, Axxya Systems). Diets were designed and prescribed on an individual basis to replicate mean energy and fluid intakes from the food diary. Diets were a standard weight-maintaining composition of 50%:35%:15% for carbohydrate, fat and protein respectively. A compliance booklet was completed by participants on the morning of each trial day to ensure all food and beverages from the previous day were consumed at the correct times and that no unplanned exertions, fluid losses or nutritional variations had occurred. Participants were instructed to complete the Bristol Stool Chart each morning for indications of disruption to fluid balance [21]. On the morning of each trial, participants reported to the laboratory at a standardised time between 07:00–09:00.

Participants were  $\geq 10$  h fasted and had not consumed any fluids since 21:30 the previous evening. Participants produced a first morning void (MV) (trial days 1–3) and a separate 24 h urine collection (trial days 2–3). Nude body weight was recorded and a venous blood sample collected. Meals and snacks were consumed at standardised times ( $\pm 30$  min); breakfast at 07:30–09:00 (immediately post testing), morning snack at 10:30, lunch at 13:30, afternoon snack at 16:30 and evening meal at 19:30.

## Beverages

As there is no clear consensus on how much fluid an individual should consume, yet fluid intake was required to be standardised for each participant, daily fluid intake was calculated based on mean individual fluid intakes recorded over the 3-day diet diary. Daily fluid intake was provided with bottled water and divided into six equal bottles, measured to the nearest gram using digital scales. Participants consumed water at pre-determined time points; between 07:30–09:00 (post testing), 10:30, 13:30, 16:30, 19:30 and 21:30. Test beverages were consumed at predetermined time points; immediately after testing (07:30–09:00), 10:30, 13:30 and 16:30. Each participant was provided with a mug marked at 200 mL. During trial C, participants received four pre-weighed containers of Nescafé Original coffee to provide 4 mg/kg BM of caffeine per day ( $2.3 \pm 0.4$  g Nescafé Original per cup) and were instructed to make the beverage with boiled tap water to the 200 mL marker in the mug provided. During trial W, participants were instructed to consume 200 mL tap water in the same mug. Total test beverage intake was 800 mL/day.

## Measures and Analysis

### Blood

Fasted blood samples (approximately 15 mL) were drawn from a superficial vein (21G Venisystem short butterfly, NU Care), typically from the median cubital vein by a trained phlebotomist following a 5 min resting period by participants in the supine position. Fasted blood samples were collected on the mornings of test days 1–3. Blood for serum and plasma analysis were collected directly into two separate tubes; one with clotting agent for analysis of serum sodium ( $\text{Na}^+$ ), potassium ( $\text{K}^+$ ), osmolality, creatinine, blood urea nitrogen (BUN) and deuterium oxide ( $\text{D}_2\text{O}$ ) for total body water (TBW) calculation and one with  $\text{K}_2\text{EDTA}$  for analysis of haematocrit, total plasma protein (TPP) and caffeine. Haematocrit was analysed using a haematocrit centrifuge (Micro Haematocrit Centrifuge, Hawksley & Sons Ltd.) and ruler (Micro Haematocrit Tube Reader, Hawksley & Sons Ltd.). All other samples were centrifuged at 3500 RPM for 15 min at  $4^\circ\text{C}$ . Plasma and serum were frozen at  $-20^\circ\text{C}$  for later analysis. All samples were analysed in duplicate, with the exception of  $\text{D}_2\text{O}$ . Serum osmolality was determined via freeze point depression via

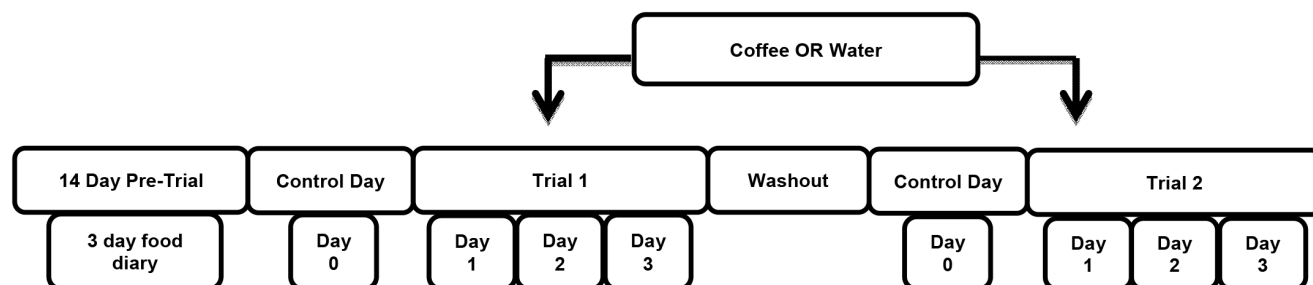

**Figure 1. Overview of study design.**

doi:10.1371/journal.pone.0084154.g001





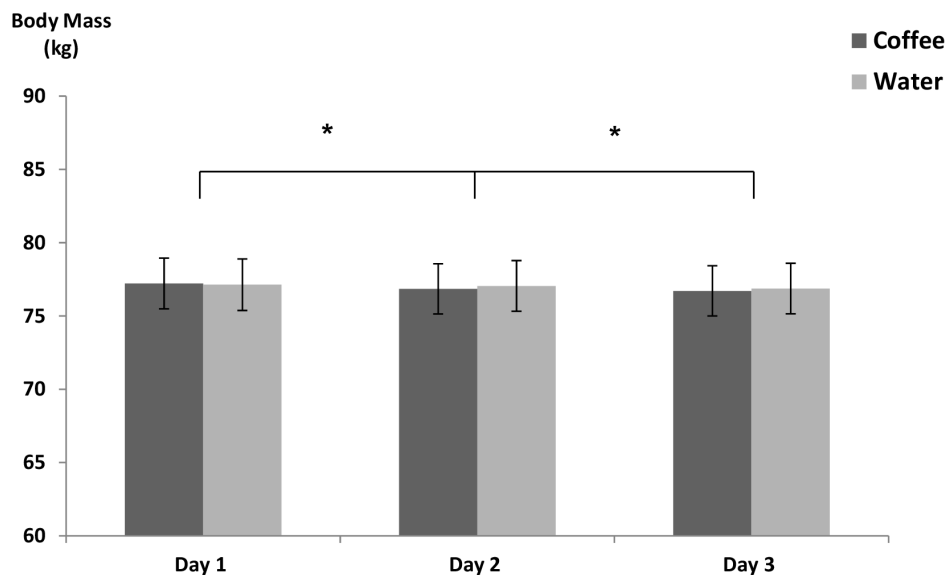

**Figure 3. Mean body mass.** \* Significant difference between days.  $n = 50$ .  
doi:10.1371/journal.pone.0084154.g003

observed between conditions in any of the haematological markers. No differences in blood urea nitrogen or serum creatinine suggest renal function was normal throughout both trials. Analysis of urinary data showed no significant differences between conditions in 24 h urine volume, urine void volume, USG or urine osmolality. Small daily fluctuations in TBW were observed during both trials; however this did not reach significance in either condition. A very recent study investigated the effects of caffeine provided in capsules (5 mg/kg/day) on the TBW of 30 male participants classified as 'low-caffeine users' (<100 mg/day) [19]. No differences in TBW were observed between the caffeine and placebo control group. Our data confirms the author's conclusions that a moderate consumption of caffeine does not disrupt TBW.

Urinary sodium was significantly higher in the coffee trial than the water trial on both days. The increased sodium excretion in the coffee trial falls in line with previous studies that have observed that both theophylline and caffeine enhance sodium excretion at the proximal and distal renal tubules [26–28]. The increase in sodium excretion is due to methylxanthine-induced natriuresis caused by inhibition of salt transport along the proximal convoluted tubule [29]. While sodium excretion is an important determinant of urine production, it is not the only driver of urine volume. Some of the water in urine is derived from 'osmotically

free' water [30], particularly when producing a relatively large volume of dilute urine as in the current study. Baseline urinary potassium was significantly elevated on day one of the coffee trial compared to day one of the water trial. The potassium content in a cup of instant coffee (200 mL and ~2 g coffee) is approximately 80 mg [30], thus participants consumed ~320 mg additional potassium during the coffee trial than during the water trial. No differences were observed between the conditions on day two, which may suggest adaptive renal handling.

Interestingly, although no changes were observed in TBW, the data showed a small fall in body mass of  $190 \pm 120$  g/day in both conditions (0.2% BM). Clinical dehydration is reported to be a body mass loss of between 1–3%, therefore whilst the 0.2% BM decrease observed in this study did reach significance; participants were not near the level of clinical dehydration. These findings are similar to the results of Grandjean et al who assessed hydration status in 18 healthy adults consuming a mean caffeine intake of between 1.40–3.13 mg/kg BM [13]. The authors reported a mean loss of 0.30% 0.39 BM across all test conditions. Authors suggested that the loss was due to normal divergence or that their method of determining treatment volumes caused a small level of dehydration to occur. One strength of our study was that the individual fluid intake during the trials was based on three-day diet diaries

**Table 3. Twenty four hour urine collection.**

| Condition/Day | Urine Volume $\pm$ SD (mL/24 h) | USG $\pm$ SD      | Urine Osmolality $\pm$ SD (mOsm/kg) | Urine Creatinine $\pm$ SD (mg/24 h) | Urine Na excretion $\pm$ SD (total mmol/24 h) | Urine K excretion $\pm$ SD (total mmol/24 h) |
|---------------|---------------------------------|-------------------|-------------------------------------|-------------------------------------|-----------------------------------------------|----------------------------------------------|
| W1            | 2521 $\pm$ 744                  | 1.009 $\pm$ 0.003 | 208.2 $\pm$ 88.2                    | 624.8 $\pm$ 183.4                   | 43.6 $\pm$ 15.5                               | 32.3 $\pm$ 14.2                              |
| W2            | 2335 $\pm$ 826                  | 1.009 $\pm$ 0.003 | 202.1 $\pm$ 89.8                    | 696.3 $\pm$ 288.1                   | 43.4 $\pm$ 16.5                               | 36.4 $\pm$ 14.0 <sup>†</sup>                 |
| C1            | 2593 $\pm$ 833                  | 1.009 $\pm$ 0.003 | 217.7 $\pm$ 103.2                   | 657.7 $\pm$ 243.8                   | 48.7 $\pm$ 15.5*                              | 36.6 $\pm$ 14.5                              |
| C2            | 2226 $\pm$ 842                  | 1.009 $\pm$ 0.004 | 243.7 $\pm$ 142.7                   | 667.4 $\pm$ 271.1                   | 47.0 $\pm$ 17.0*                              | 40.3 $\pm$ 16.8 <sup>†</sup>                 |

Values are means  $\pm$  SD.

\*Coffee significantly higher than water.

<sup>†</sup>Day 2 significantly higher than day 1.

doi:10.1371/journal.pone.0084154.t003

**Table 4.** Urine void volume and USG.

| Condition/Day | Urine Void Volume (mL) | Urine Void USG |
|---------------|------------------------|----------------|
| W1            | 349.2±177.0            | 1.019±0.005    |
| W2            | 361.9±168.0            | 1.017±0.006    |
| W3            | 339.8±143.6            | 1.018±0.006    |
| C1            | 344.6±183.6            | 1.017±0.005    |
| C2            | 360.1±171.8            | 1.018±0.005    |
| C3            | 338.3±157.6            | 1.018±0.005    |

Values are means ± SD.

doi:10.1371/journal.pone.0084154.t004

instead of a fixed volume for everyone. Furthermore, if participants felt they were not allocated a sufficient volume of water at any point during the first trial or indeed if they had too much water, they were permitted to return to the laboratory to have their fluid allocation amended. The adjusted fluid intake was recorded and repeated during the second trial. The small losses in body mass observed in this study are likely to be multifactorial. As suggested by Grandjean et al [13], it is also possible that part of the mass loss observed in this study was due to natural divergence or that participants were not provided with sufficient water during the trials. The urinary data in the current study shows participants were producing relatively large amounts of dilute urine (urine osmolality < serum osmolality), which suggests dehydration is unlikely to be the cause of the fall in body mass. One other possible cause of the body mass loss could be due to unmeasured faecal losses. Participants completed a compliance booklet each day which included questions regarding faecal losses and included the validated Bristol Stool Chart. Data collected from this booklet would highlight any unusual stool production, but as samples were not weighed it is not possible to know how much volume was excreted. No unusual faecal losses were reported by any of the participants.

This study is limited by the nature of its design. To achieve optimal results, a metabolic ward would have provided the most control of the environment and of the participants; however in an attempt to understand the effects of coffee consumption in a 'free-living' setting, some control will always be lost. Furthermore, it may have been beneficial to continue the 24 h urine collection on the third day however this was not possible due to time constraints and demands on the participants. It may have been interesting to include a decaffeinated coffee condition as this would have identified any differences specifically caused by caffeine in coffee and not any of the other bioactive components, however as we found minimal differences between coffee and water we believe that it is unlikely that we would have found any significant differences if we had included a decaffeinated coffee condition.

With acknowledgement of the study's limitations, results suggest that coffee did not result in dehydration when provided in a moderate dose of 4 mg/kg BW caffeine in four cups per day. Thus, these data suggest that coffee, when consumed in moderation by caffeine habituated males contributes to daily fluid requirement and does not pose a detrimental effect to fluid balance. The advice provided in the public health domain regarding coffee intake and hydration status should therefore be updated to reflect these findings.

**Table 5.** Haematological data collected over each three day trial.

| Condition/Day | Haematocrit (%) | Serum Osmolality (mOsm/kg) | TPP (g/L) | Serum Creatinine (mmol/L) | Serum Na (mmol/L) | Serum K (mmol/L) | Blood Urea Nitrogen (mmol/L) |
|---------------|-----------------|----------------------------|-----------|---------------------------|-------------------|------------------|------------------------------|
| W1            | 43.9±2.0        | 284±23                     | 73.9±8.1  | 98.9±11.7                 | 141±4             | 4.1±0.3          | 4.6±0.9                      |
| W2            | 44.0±2.1        | 287±11                     | 73.7±6.8  | 95.9±12.4                 | 141±3             | 4.2±0.2          | 4.8±1.0                      |
| W3            | 44.0±2.1        | 285±3                      | 74.2±9.2  | 95.2±11.2                 | 141±4             | 4.2±0.2          | 4.7±0.8                      |
| C1            | 43.9±2.3        | 286±7                      | 73.9±11.0 | 97.7±13.9                 | 141±3             | 4.2±0.3          | 4.7±1.2                      |
| C2            | 44.6±2.4        | 288±8                      | 75.8±9.4  | 97.5±11.6                 | 141±3             | 4.1±0.2          | 4.8±1.0                      |
| C3            | 43.9±2.2        | 286±3                      | 74.7±9.4  | 97.1±11.7                 | 141±3             | 4.2±0.2          | 4.9±1.3                      |

Values are means ± SD.

doi:10.1371/journal.pone.0084154.t005

## Acknowledgments

We would like to offer our gratitude to Charlie Matthews, Hayley Weaver and Yasmin Elhadidi for their support, dedication and diligence with data collection during this study. We would also like to thank all participants for their patience and compliance throughout this time consuming study. Disclaimer: The research paper reflects the work and opinions of the authors only.

## References

- Perrier E, Vergne S, Klein A, Poupin M, Rondeau P, et al. (2013) Hydration biomarkers in free-living adults with different levels of habitual fluid consumption. *Br J Nutr* 109: 1678–1687.
- Bellisle F, Thornton SN, Hebel P, Tahiri M (2010) A study of fluid intake from beverages in a sample. *EJCN* 64: 350–355.
- EFSA Panel on Dietetic Products, Nutrition, and Allergies (2010) Scientific opinion on dietary reference values for water. *EFSA Journal* 8: 1459.
- Jéquier E, Constant F (2010) Water as an essential nutrient: The physiological basis of hydration. *EJCN* 64: 115–123.
- IoM (Institute of Medicine) (2004) Dietary reference intakes for water, potassium, sodium, chloride and sulfate. Washington DC: National Academies Press.
- Kleiner SM (1999) Water: An essential but overlooked nutrient. *J Am Diet Assoc* 99: 200–206.
- WaterAid (2012) Hydration tips. WaterAid 2012. Available: [http://www.wateraid.org/uk/get\\_involved/drink\\_more\\_water/1412.asp](http://www.wateraid.org/uk/get_involved/drink_more_water/1412.asp). Accessed 2012 Sep 11.
- Bird ET, Parker BD, Kim HS, Coffield SK (2005) Caffeine ingestion and lower urinary tract symptoms in healthy volunteers. *Neurourology and Urodynamics* 24: 611–615.
- Wemple RD, Lamb DR, McKeever KH (1997) Caffeine vs caffeine-free sports drinks: Effects on urine production at rest and during prolonged exercise. *Int J Sports Med* 18: 40–46.
- Neuhauser-Berthold BS, Verwied SC, Luhmann PM (1997) Coffee consumption and total body water homeostasis as measured by fluid balance and bioelectrical impedance analysis. *Ann Nutr Metab* 41: 29–36.
- Eddy N, Downs A (1928) Tolerance and cross-tolerance in the human subject to the diuretic effect of caffeine, theobromine, and theophylline. *J Pharmacol Exper Ther* 33: 167–174.
- Fisher SM, McMurray RG, Berry M, Mar MH, Forsythe WA (1986) Influence of caffeine on exercise performance in habitual caffeine users. *Int J Sports Med* 7: 276–280.
- Grandjean A, Reimers K, Bannick K, Haven M (2000) The effect of caffeinated, non-caffeinated, caloric and non-caloric beverages on hydration. *Journal of the American College of Nutrition* 19: 591–600.
- Armstrong L, Pumerantz A, Roti M, Judelson D, Watson G, et al. (2005) Fluid, electrolyte, and renal indices of hydration during 11 days of controlled caffeine consumption. *IJSNEM* 15: 252–265.
- Dorfman IJ, Jarvik ME (1970) Comparative stimulant and diuretic actions of caffeine and theobromine in man. *Clin Pharmacol Ther* 11: 869–872.
- Ruxton CH, Hart VA (2011) Black tea is not significantly different from water in the maintenance of normal hydration in human subjects: Results from a randomised controlled trial. *Br J Nutr* 106: 588–595.
- Passmore AP, Kondowe GB, Johnston GD (1987) Renal and cardiovascular effects of caffeine: A dose-response study. *Clin Sci (Lond)* 72: 749–756.
- Graham TE, Hibbert E, Sathasivam P (1998) Metabolic and exercise endurance effects of coffee and caffeine ingestion. *J Appl Physiol* 85: 883–889.
- Silva A, Judice P, Matias C, Santos D, Magalhaes J, et al. (2013) Total body water and its compartments are not affected by ingesting a moderate dose of caffeine in healthy young adult males. *Appl Physiol Nutr Metab Just-IN*.
- The Fairtrade Foundation (2012) Fairtrade and coffee report.
- Lewis SJ, Heaton KW (1997) Stool form scale as a useful guide to intestinal transit time. *Scand J Gastroenterol* 32: 920–924.
- Hodgson AB, Randell RK, Jeukendrup AE (2013) The metabolic and performance effects of caffeine compared to coffee during endurance exercise. *PLoS One* 8: e59561.
- Currell K, Urch J, Cerri E, Jentjens RL, Blannin AK, et al (2008) Plasma deuterium oxide accumulation following ingestion of different carbohydrate beverages. *Appl Physiol Nutr Metab* 33: 1067–1072.
- Metabolic Solutions Inc. (2009) Measurement of total body water, extracellular and intracellular water.
- Robertson D, Wade D, Workman R, Woosley RL, Oates JA (1981) Tolerance to the humoral and hemodynamic effects of caffeine in man. *J Clin Invest* 67: 1111–1117.
- Dodd SL, Herb RA, Powers SK (1993) Caffeine and exercise performance. an update. *Sports Med* 15: 14–23.
- Fredholm BB (1984) Cardiovascular and renal actions of methylxanthines. *Prog Clin Biol Res* 158: 303–330.
- Osswald H, Schnermann J (2011) Methylxanthines and the kidney. *Handb Exp Pharmacol* (200):391–412. doi: 391–412.
- Lote CJ (2012) Principles of renal physiology. New York: Springer. 197 p.
- Debry G (1994) Coffee and health. Montrouge (France): John Libbey Eurotext. 545 p.
- Nussberger J, Mooser V, Maridor G, Juillerat L, Waeber B, et al. (1990) Caffeine-induced diuresis and atrial natriuretic peptides. *J Cardiovasc Pharmacol* 15: 685–691.
- Riesenhuber A, Boehm M, Posch M, Aufricht C (2006) Diuretic potential of energy drinks. *Amino Acids* 31: 81–83.

## Author Contributions

Conceived and designed the experiments: SCK AEJ. Performed the experiments: SCK. Analyzed the data: SCK AEJ AKB. Contributed reagents/materials/analysis tools: SCK AEJ AKB. Wrote the paper: SCK. Statistical analysis: SCK AKB AEJ. Editing of final paper: AKB AEJ.
